# Supplementary material for: Ethnic disparities in maternal obesity and weight gain during pregnancy. The Generation R Study
Source: PubMed Central journal article supplement — Eur J Obstet Gynecol Reprod Biol. Author manuscript; Available in PMC 2017 Apr 28. (PMC5408938; doi:10.1016/j.ejogrb.2015.06.031), 2015-07-08
Supplement: NIHMS66131-supplement-Supplementary_Material.pdf [file NIHMS66131-supplement-Supplementary_Material.pdf]

SUPPLEMENTARY TABLE S1 MISSINGS (N = 6,444)<sup>1</sup>

|                                           | Dutch-origin<br>N=3,992 | Cape<br>Verdean-origin<br>N=350 | Dutch<br>Antillean-<br>origin<br>N=282 | Moroccan-<br>origin<br>N=574 | Surinamese-<br>Creoles-origin<br>N=239 | Surinamese-<br>Hindustani-<br>origin<br>N=251 | Turkish-origin<br>N=756 |
|-------------------------------------------|-------------------------|---------------------------------|----------------------------------------|------------------------------|----------------------------------------|-----------------------------------------------|-------------------------|
| <b>Maternal Characteristics</b>           |                         |                                 |                                        |                              |                                        |                                               |                         |
| Age                                       | 0                       | 0                               | 0                                      | 0                            | 0                                      | 0                                             | 0                       |
| Gestational age at intake                 | 0                       | 0                               | 0                                      | 0                            | x                                      | 0                                             | 0                       |
| Height                                    | 0.1                     | 0                               | 0                                      | 1.4                          | 0.8                                    | 0                                             | 0.4                     |
| Weight                                    | 14.1                    | 21.4                            | 20.9                                   | 21.1                         | 14.6                                   | 13.5                                          | 14.4                    |
| Body mass index                           | 14.2                    | 21.4                            | 20.9                                   | 21.8                         | 15.5                                   | 13.5                                          | 14.8                    |
| Total gestational weight gain             | 48.6                    | 81.4                            | 77.7                                   | 82.1                         | 76.2                                   | 74.9                                          | 75.3                    |
| First trimester weight gain               | 26.2                    | 39.1                            | 40.8                                   | 43.2                         | 37.7                                   | 25.9                                          | 35.8                    |
| Second trimester weight gain              | 17.0                    | 23.1                            | 30.5                                   | 33.6                         | 29.7                                   | 19.1                                          | 29.0                    |
| Third trimester weight gain               | 44.7                    | 78.3                            | 75.9                                   | 79.8                         | 79.5                                   | 70.9                                          | 74.3                    |
| Parity                                    | 0.3                     | 1.4                             | 1.1                                    | 0.9                          | 0                                      | 0                                             | 0.4                     |
| Educational level                         | 1.5                     | 8.0                             | 5.0                                    | 12.9                         | 1.7                                    | 1.2                                           | 7.0                     |
| Income                                    | 12.0                    | 36.6                            | 31.6                                   | 44.1                         | 34.7                                   | 30.3                                          | 28.6                    |
| Marital status                            | 3.0                     | 7.4                             | 5.0                                    | 9.8                          | 0.4                                    | 2.0                                           | 4.8                     |
| Smoking habits                            | 7.6                     | 14.3                            | 7.4                                    | 14.8                         | 4.2                                    | 4.4                                           | 8.2                     |
| Alcohol consumption                       | 8.3                     | 14.3                            | 7.4                                    | 14.3                         | 6.3                                    | 5.6                                           | 11.4                    |
| Folic acid supplement use                 | 18.4                    | 27.4                            | 27.3                                   | 27.0                         | 21.8                                   | 21.5                                          | 25.3                    |
| Diet, total energy intake                 | 13.0 (511)              | 38.3                            | 37.6                                   | 47.2                         | 33.5                                   | 35.9                                          | 47.6                    |
| <b>Pregnancy complications</b>            |                         |                                 |                                        |                              |                                        |                                               |                         |
| Gestational hypertensive disorders        | 3.7                     | 3.1                             | 7.1                                    | 2.1                          | 6.3                                    | 3.6                                           | 2.8                     |
| Gestational diabetes                      | 3.7                     | 3.4                             | 6.0                                    | 3.1                          | 5.9                                    | 4.8                                           | 3.3                     |
| <b>Delivery and birth characteristics</b> |                         |                                 |                                        |                              |                                        |                                               |                         |
| Gestational age at birth                  | 0.1                     | 0                               | 0.4                                    | 0                            | 0                                      | 0                                             | 0                       |
| Birth weight                              | 0.4                     | 1.1                             | 1.4                                    | 0.5                          | 1.7                                    | 1.2                                           | 0.5                     |
| Sex                                       | 0                       | 0                               | 0                                      | 0                            | 0                                      | 0                                             | 0                       |
| Caesarian section                         | 7.7                     | 10.9                            | 10.3                                   | 11.1                         | 11.7                                   | 8.8                                           | 11.0                    |
| Preterm birth <sup>2</sup>                | 5.0                     | 5.7                             | 6.7                                    | 2.6                          | 5.4                                    | 8.0                                           | 4.9                     |
| Small for gestational age <sup>2</sup>    | 0.5                     | 1.1                             | 2.1                                    | 0.7                          | 1.7                                    | 1.2                                           | 0.5                     |

|                                        |     |     |     |     |     |     |     |
|----------------------------------------|-----|-----|-----|-----|-----|-----|-----|
| Large for gestational age <sup>2</sup> | 0.6 | 1.1 | 2.1 | 0.9 | 1.7 | 1.2 | 0.9 |
|----------------------------------------|-----|-----|-----|-----|-----|-----|-----|

---

<sup>1</sup>Values are percentages of missing values. <sup>2</sup>SGA is defined as <10<sup>th</sup> percentile of age-and sex-adjusted birth weight; LGA is defined as 90<sup>th</sup> percentile of age-and sex-adjusted birth weight; preterm birth is defined as <37 weeks of gestation.
